# Supplementary material for: Silicon Controls Bacterial Wilt Disease in Tomato Plants and Inhibits the Virulence-Related Gene Expression of Ralstonia solanacearum
Source: MDPI journal article supplement (doi:10.3390/ijms23136965), 2022-06-23
Supplement: s1 [file s1]

# Silicon Controls Bacterial Wilt Disease in Tomato Plants and Inhibits the Virulence-Related Gene Expression of *Ralstonia solanacearum*

Lei Wang <sup>1</sup>, Yang Gao <sup>1</sup>, Nihao Jiang <sup>1</sup>, Jian Yan <sup>1</sup>, Weipeng Lin <sup>2,\*</sup> and Kunzheng Cai <sup>1,3,\*</sup>

<sup>1</sup> Guangdong Provincial Key Laboratory of Eco-Circular Agriculture, Guangzhou 510642, China; kishi218@163.com (L.W.); likoscau@gmail.com (Y.G.); jnhskip@hotmail.com (N.J.); yanjian78@scau.edu.cn (J.Y.)

<sup>2</sup> Tea Research Institute, Guangdong Academy of Agricultural Sciences/Guangdong Key Laboratory of Tea Plant Resources Innovation & Utilization, Guangzhou 510640, China

<sup>3</sup> College of Natural Resources and Environment, South China Agricultural University, Guangzhou 510642, China

\* Correspondence: linweipeng@gdaas.cn (W.L.); kzcai@scau.edu.cn (K.C.); Tel.: +86-20-88523253 (W.L.); +86-20-38297175 (K.C.)

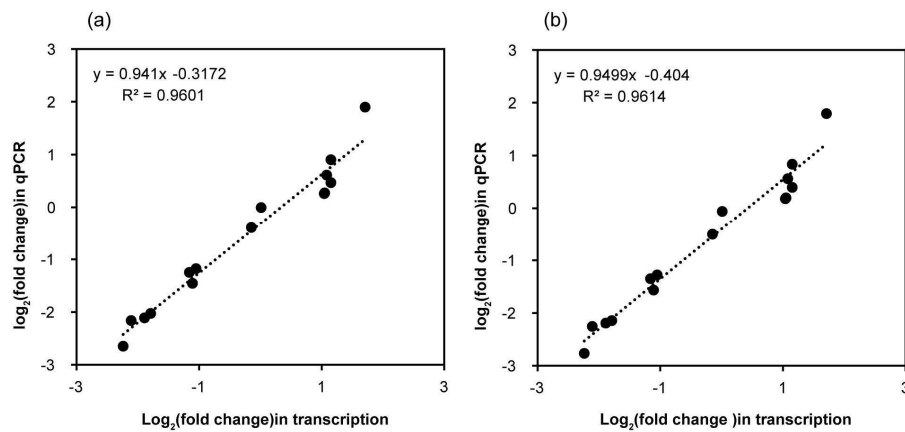

Figure S1. Correlation of transcription (x axis) and qPCR data (y axis) for a subset of 15 DEGs.

(a) *GAPDH* gene as internal control. (b) *thyA* gene as internal control.

## KEGG pathway annotation

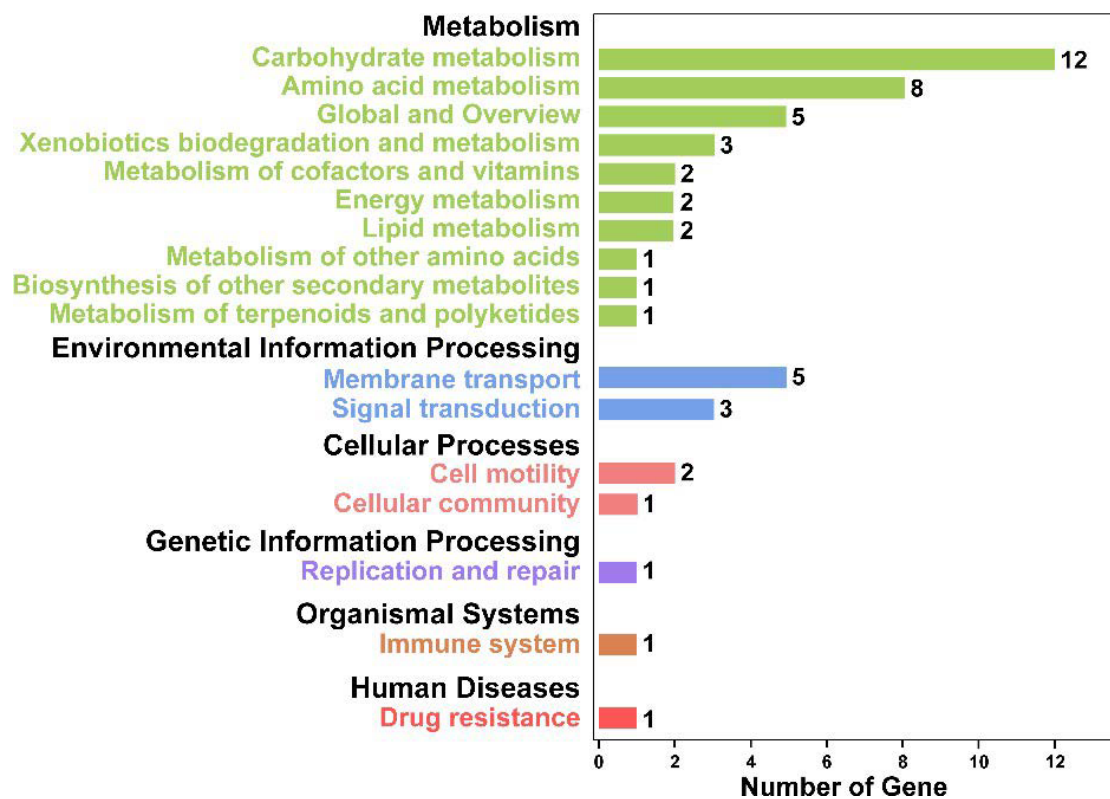

Figure S2. KEGG pathway annotation.

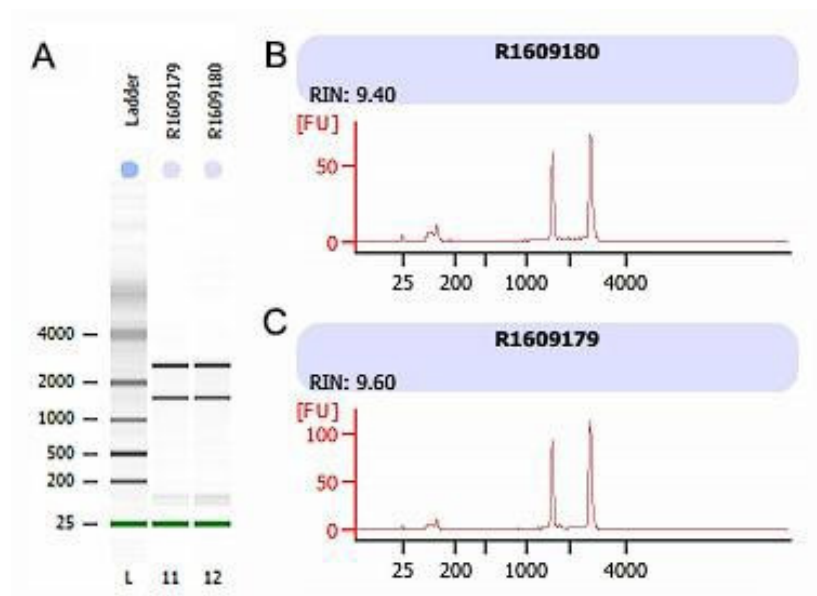

Figure S3. Quality of the extracted RNA. A: Capillary electrophoresis of the samples; B:

Integrity of CK samples; C: Integrity of Si samples.

Table S1 The genes significantly upregulated in Si treatment compared with CK

| No. | Gene ID | log2(FC) | <i>p</i> -value | No. | Gene ID | log2(FC) | <i>p</i> -value |
|-----|---------|----------|-----------------|-----|---------|----------|-----------------|
| 1   | RSc0699 | 13.32    | 1.56E-02        | 30  | RSc2519 | 1.21     | 1.67E-02        |
| 2   | RSp1151 | 13.27    | 1.56E-02        | 31  | RSc0199 | 1.2      | 5.42E-03        |
| 3   | RSc3187 | 13.05    | 7.82E-03        | 32  | RSc1963 | 1.2      | 7.78E-50        |
| 4   | RSc1895 | 3.62     | 1.84E-03        | 33  | RSc0583 | 1.2      | 6.67E-03        |
| 5   | RSc3357 | 3.25     | 1.17E-02        | 34  | RSc1325 | 1.19     | 1.38E-02        |
| 6   | RSp0632 | 2.52     | 1.30E-02        | 35  | RSp0002 | 1.15     | 4.54E-19        |
| 7   | RSc1850 | 2.26     | 7.56E-03        | 36  | RSc2080 | 1.15     | 1.02E-32        |
| 8   | RSp1108 | 2.24     | 5.13E-77        | 37  | RSc1057 | 1.15     | 1.76E-56        |
| 9   | RSp1107 | 2.21     | 1.08E-14        | 38  | RSc0609 | 1.13     | 4.75E-40        |
| 10  | RSc1241 | 2.2      | 5.51E-04        | 39  | RSp1106 | 1.12     | 1.87E-25        |
| 11  | RSp0379 | 2.18     | 2.61E-03        | 40  | RSc0593 | 1.12     | 2.96E-06        |
| 12  | RSp0564 | 1.97     | 5.41E-41        | 41  | RSc1254 | 1.12     | 2.65E-10        |
| 13  | RSp1464 | 1.76     | 1.45E-04        | 42  | RSp0602 | 1.09     | 4.13E-03        |
| 14  | RSp1552 | 1.71     | 3.79E-11        | 43  | RSc0723 | 1.09     | 1.88E-05        |
| 15  | RSp0199 | 1.58     | 4.58E-03        | 44  | RSc2740 | 1.09     | 1.21E-02        |
| 16  | RSp1638 | 1.49     | 1.37E-07        | 45  | RSc1614 | 1.08     | 3.53E-04        |
| 17  | RSc0076 | 1.48     | 4.08E-12        | 46  | RSc0374 | 1.08     | 1.56E-18        |
| 18  | RSc1025 | 1.46     | 2.94E-04        | 47  | RSc2780 | 1.06     | 6.08E-06        |
| 19  | RSc2388 | 1.45     | 4.68E-04        | 48  | RSp1449 | 1.06     | 8.09E-53        |
| 20  | RSc1622 | 1.41     | 9.10E-03        | 49  | RSc2680 | 1.05     | 1.46E-05        |
| 21  | RSc1159 | 1.38     | 5.33E-04        | 50  | RSc0722 | 1.04     | 2.25E-04        |
| 22  | RSp0757 | 1.36     | 1.62E-02        | 51  | RSc0719 | 1.03     | 1.55E-03        |
| 23  | RSc0512 | 1.33     | 1.28E-03        | 52  | RSc2528 | 1.02     | 4.68E-21        |
| 24  | RSp0443 | 1.3      | 2.30E-08        | 53  | RSc2880 | 1.01     | 1.49E-09        |
| 25  | RSp0708 | 1.3      | 3.84E-03        | 54  | RSc0570 | 1.01     | 4.37E-04        |
| 26  | RSc3150 | 1.29     | 6.87E-11        | 55  | RSc2725 | 1.01     | 3.44E-04        |
| 27  | RSc2280 | 1.26     | 1.59E-06        | 56  | RSc2629 | 1        | 3.61E-05        |
| 28  | RSc2506 | 1.26     | 1.11E-03        | 57  | RSc0980 | 1        | 4.71E-06        |
| 29  | RSp0713 | 1.21     | 1.32E-03        |     |         |          |                 |

Table S2 The genes significantly downregulated in Si treatment compared with CK

| No. | Gene ID | log2(FC) | p-value  | No. | Gene ID | log2(FC) | p-value  |
|-----|---------|----------|----------|-----|---------|----------|----------|
| 1   | RSp0937 | -12.58   | 3.91E-03 | 32  | RSc0093 | -1.26    | 0.00E+00 |
| 2   | RSc0626 | -2.88    | 4.20E-03 | 33  | RSc1093 | -1.26    | 8.01E-03 |
| 3   | RSc3301 | -2.24    | 0.00E+00 | 34  | RSp0479 | -1.24    | 2.01E-09 |
| 4   | RSp0106 | -2.1     | 8.82E-55 | 35  | RSp1001 | -1.22    | 2.35E-92 |
| 5   | RSp1373 | -2.07    | 1.19E-02 | 36  | RSp1005 | -1.21    | 9.87E-07 |
| 6   | RSc2984 | -1.99    | 1.13E-16 | 37  | RSc2313 | -1.21    | 1.94E-04 |
| 7   | RSp1510 | -1.94    | 3.74E-03 | 38  | RSp0306 | -1.2     | 1.59E-03 |
| 8   | RSc2641 | -1.91    | 1.00E-04 | 39  | RSc2981 | -1.2     | 1.06E-35 |
| 9   | RSc2983 | -1.89    | 1.25E-79 | 40  | RSp0836 | -1.17    | 4.34E-08 |
| 10  | RSp1002 | -1.87    | 0.00E+00 | 41  | RSc2756 | -1.16    | 2.47E-11 |
| 11  | RSp0982 | -1.85    | 3.02E-11 | 42  | RSc3232 | -1.16    | 1.34E-02 |
| 12  | RSp1003 | -1.79    | 0.00E+00 | 43  | RSp1249 | -1.14    | 4.90E-07 |
| 13  | RSp0319 | -1.78    | 8.93E-42 | 44  | RSp0837 | -1.13    | 3.61E-06 |
| 14  | RSp0482 | -1.75    | 1.08E-03 | 45  | RSp0838 | -1.13    | 2.37E-05 |
| 15  | RSp0377 | -1.73    | 1.47E-02 | 46  | RSp0829 | -1.11    | 1.28E-02 |
| 16  | RSc0190 | -1.73    | 1.47E-02 | 47  | RSp1016 | -1.11    | 4.10E-15 |
| 17  | RSp1526 | -1.71    | 2.05E-18 | 48  | RSp0140 | -1.11    | 6.53E-03 |
| 18  | RSc0931 | -1.65    | 1.26E-02 | 49  | RSc2980 | -1.1     | 1.09E-14 |
| 19  | RSp1004 | -1.56    | 0.00E+00 | 50  | RSc2113 | -1.1     | 3.11E-03 |
| 20  | RSp1268 | -1.55    | 1.74E-21 | 51  | RSc2755 | -1.08    | 7.61E-11 |
| 21  | RSp1366 | -1.52    | 2.92E-03 | 52  | RSp0971 | -1.07    | 1.77E-02 |
| 22  | RSc2982 | -1.47    | 1.26E-59 | 53  | RSp0650 | -1.07    | 5.22E-03 |
| 23  | RSp0484 | -1.4     | 3.64E-43 | 54  | RSc0538 | -1.05    | 2.55E-12 |
| 24  | RSp1000 | -1.39    | 0.00E+00 | 55  | RSp1633 | -1.05    | 4.03E-85 |
| 25  | RSc0597 | -1.37    | 5.95E-04 | 56  | RSp0485 | -1.04    | 5.42E-05 |
| 26  | RSp0696 | -1.37    | 2.22E-03 | 57  | RSc1825 | -1.03    | 8.74E-03 |
| 27  | RSc1750 | -1.36    | 9.54E-03 | 58  | RSp0649 | -1.02    | 1.28E-02 |
| 28  | RSp1527 | -1.35    | 2.97E-59 | 59  | RSp1636 | -1.02    | 5.85E-24 |
| 29  | RSp1401 | -1.33    | 3.22E-03 | 60  | RSp0995 | -1.01    | 2.55E-04 |
| 30  | RSc3128 | -1.31    | 2.37E-36 | 61  | RSp1011 | -1.01    | 3.95E-23 |
| 31  | RSp0483 | -1.28    | 7.65E-46 | 62  | RSp1530 | -1       | 2.86E-42 |

Table S3 Gene primer sequence for qPCR

| Accession | Gene         | Primer Sequence (5'-3') |                        |
|-----------|--------------|-------------------------|------------------------|
| RSc2749   | <i>GAPDH</i> | F                       | CGCCATCGCCAACTTCAA     |
|           |              | R                       | GTTGACGACCAGCGTATTGC   |
| RSc0947   | <i>thyA</i>  | F                       | GGCGACTGCCATCTCTACAAC  |
|           |              | R                       | GCGGGATGGCTTTCGTAG     |
| RSc2553   | <i>argG</i>  | F                       | CCTATGCCTACACCGCCAA    |
|           |              | R                       | CGTGGTGTTGAAGTAGGTGATG |
| RSc0374   | <i>rpoH</i>  | F                       | GCCGAGATGCACGAGTACA    |
|           |              | R                       | CCACCGCATCGACTTCGT     |
| RSc0722   | <i>fimT</i>  | F                       | AAGCAGCCGCAGGTCAC      |
|           |              | R                       | GACAAGGAGGTGAGGCAGG    |
| RSc1057   | <i>rseB</i>  | F                       | GGTGGCATTCTCGCAAGTC    |
|           |              | R                       | AGCCCGTCACGCTCTTCA     |
| RSc2680   | <i>pilE</i>  | F                       | CGGTTCTGGCGTATCCCT     |
|           |              | R                       | TCGTGAGGTCCGAGGCAT     |
| RSc2748   | <i>phcA</i>  | F                       | CCTACAACCTCAACGCCTTCC  |
|           |              | R                       | CAGCATCGGGTGCGTGTT     |
| RSc2756   | <i>araH</i>  | F                       | TGATCGCCCGGCTGAAG      |
|           |              | R                       | TGGTGTGCCCAGGTCG       |
| RSc2983   | <i>rpoE</i>  | F                       | GCGTGGCTGTTGACCATCA    |
|           |              | R                       | TCGGTAGGCCAGTTGCTCC    |
| RSc3301   | <i>putA</i>  | F                       | CGCCATGACGGAAGAGGA     |
|           |              | R                       | GCTTGATCGAGATGCCCCG    |
| RSp0002   | <i>cspD3</i> | F                       | AAAGGCTTCGGCTTCATCA    |
|           |              | R                       | CTTGATACCCGAGGCTTGC    |
| RSp0106   | <i>modA</i>  | F                       | GACCAATGCCTTCAAGACGC   |
|           |              | R                       | GCCTTGTCATCGCTTCCT     |
| RSp1003   | <i>xpsR</i>  | F                       | CGGTGGCAATCGCATCA      |
|           |              | R                       | CTTCCAGTCGCATTGCTCT    |
| RSp1016   | <i>epsD</i>  | F                       | ATCGCCTTCGCCAATGAG     |
|           |              | R                       | GGCTTGGCATCGTTGACC     |
| RSp1552   | <i>degP</i>  | F                       | ACCTCCATCCAGGGTTTGC    |
|           |              | R                       | ATTGCTTGTCACCCCCA      |
| RSp1633   | <i>xylF</i>  | F                       | GGGCATCAAGGTGGTCTCG    |
|           |              | R                       | GGCGTTGTTGTCGGTGGA     |

Table S4 DEGs function definition in KEGG database

| No. | Gene ID | KEGG ID | Gene Name    | Function Definition                                                       | Patten |
|-----|---------|---------|--------------|---------------------------------------------------------------------------|--------|
| 1   | RSc0093 | K01251  | <i>ahcY</i>  | adenosylhomocysteinase                                                    | down   |
| 2   | RSc0190 | K01420  | <i>fnr</i>   | CRP/FNR family transcriptional regulator, anaerobic regulatory protein    | down   |
| 3   | RSc0626 | K07302  | <i>iorA</i>  | isoquinoline 1-oxidoreductase subunit alpha                               | down   |
| 4   | RSc1093 | K08195  | <i>pcaK</i>  | 4-hydroxybenzoate transporter branched-chain amino acid                   | down   |
| 5   | RSc1750 | K01999  | <i>livK</i>  | transport system substrate-binding protein                                | down   |
| 6   | RSc1825 | K00450  |              | gentisate 1,2-dioxygenase                                                 | down   |
| 7   | RSc2755 | K13874  | <i>araB</i>  | L-arabinonolactonase                                                      | down   |
| 8   | RSc2756 | K10538  | <i>araH</i>  | L-arabinose transport system permease protein                             | down   |
| 9   | RSc2980 | K17247  | <i>msrQ</i>  | methionine sulfoxide reductase heme-binding subunit                       | down   |
| 10  | RSc2981 | K07147  | <i>msrP</i>  | methionine sulfoxide reductase catalytic subunit                          | down   |
| 11  | RSc2983 | K03088  | <i>rpoE</i>  | RNA polymerase sigma-70 factor, ECF subfamily                             | down   |
| 12  | RSc3128 | K00138  | <i>aldB</i>  | aldehyde dehydrogenase                                                    | down   |
| 13  | RSc3301 | K13821  | <i>putA</i>  | RHH-type transcriptional regulator, proline utilization regulon repressor | down   |
| 14  | RSp0106 | K02020  | <i>modA</i>  | molybdate transport system substrate-binding protein                      | down   |
| 15  | RSp0319 | K01534  | <i>zntA</i>  | Cd-exporting ATPase                                                       | down   |
| 16  | RSp0377 | K02417  | <i>fliNY</i> | flagellar motor switch protein FliN/FliY                                  | down   |
| 17  | RSp0479 | K02028  |              | polar amino acid transport system ATP-binding protein                     | down   |
| 18  | RSp0483 | K01750  | <i>ocd</i>   | ornithine cyclodeaminase                                                  | down   |
| 19  | RSp0485 | K01091  | <i>gph</i>   | phosphoglycolate phosphatase                                              | down   |
| 20  | RSp0649 | K00020  | <i>mmsB</i>  | 3-hydroxyisobutyrate dehydrogenase                                        | down   |
| 21  | RSp0650 | K00140  | <i>mmsA</i>  | methylmalonate-semialdehyde dehydrogenase                                 | down   |
| 22  | RSp0696 | K04127  | <i>cefD</i>  | isopenicillin-N epimerase                                                 | down   |
| 23  | RSp0829 | K01706  | <i>gudD</i>  | glucarate dehydratase                                                     | down   |

|    |         |        |             |                                                            |      |
|----|---------|--------|-------------|------------------------------------------------------------|------|
| 24 | RSp0836 | K03462 |             | nicotinamide<br>phosphoribosyltransferase                  | down |
| 25 | RSp0937 | K02160 |             | acetyl-CoA carboxylase biotin<br>carboxyl carrier protein  | down |
| 26 | RSp0995 | K11103 | <i>dctA</i> | aerobic C4-dicarboxylate<br>transport protein              | down |
| 27 | RSp1003 | K19667 | <i>xpsR</i> | transcriptional activator of eps<br>genes                  | down |
| 28 | RSp1016 | K02472 | <i>epsD</i> | UDP-N-acetyl-D-mannosaminuro<br>nic acid dehydrogenase     | down |
| 29 | RSp1366 | K03734 | <i>apbE</i> | FMN transferase                                            | down |
| 30 | RSp1373 | K19342 | <i>NosL</i> | copper chaperone                                           | down |
| 31 | RSp1401 | K03414 | <i>cheZ</i> | chemotaxis protein                                         | down |
| 32 | RSp1633 | K10543 | <i>xylF</i> | D-xylose transport system<br>substrate-binding protein     | down |
| 33 | RSc0199 | K12262 | <i>cybB</i> | cytochrome b561                                            | up   |
| 34 | RSc0374 | K03089 | <i>rpoH</i> | RNA polymerase sigma-32 factor                             | up   |
| 35 | RSc0570 | K05786 | <i>rarD</i> | chloramphenicol-sensitive protein                          | up   |
| 36 | RSc0583 | K03753 | <i>mobB</i> | molybdopterin-guanine<br>dinucleotide biosynthesis protein | up   |
| 37 | RSc0722 | K08084 | <i>fimT</i> | type IV fimbrial biogenesis<br>protein                     | up   |
| 38 | RSc0980 | K07240 | <i>chrA</i> | chromate transporter                                       | up   |
| 39 | RSc1025 | K04755 | <i>fdx</i>  | ferredoxin, 2Fe-2S                                         | up   |
| 40 | RSc1057 | K03598 | <i>rseB</i> | sigma-E factor negative<br>regulatory protein              | up   |
| 41 | RSc1241 | K17213 | <i>IbpA</i> | inositol transport system<br>substrate-binding protein     | up   |
| 42 | RSc1963 | K03832 | <i>tonB</i> | periplasmic protein TonB                                   | up   |
| 43 | RSc2506 | K00567 | <i>ogt</i>  | methylated-DNA-[protein]-cystei<br>ne S-methyltransferase  | up   |
| 44 | RSc2528 | K03561 | <i>exbB</i> | biopolymer transport protein                               | up   |
| 45 | RSc2680 | K02655 | <i>pilE</i> | type IV pilus assembly protein<br>PilE                     | up   |
| 46 | RSc2780 | K03181 | <i>ubiC</i> | chorismate--pyruvate lyase                                 | up   |
| 47 | RSp0002 | K03704 | <i>cspA</i> | cold shock protein                                         | up   |
| 48 | RSp0379 | K02415 | <i>fliL</i> | flagellar Flil protein                                     | up   |
| 49 | Rsp1151 | K01821 |             | 4-oxalocrotonate tautomerase                               | up   |
| 50 | RSp1464 | K02003 |             | putative ABC transport system<br>ATP-binding protein       | up   |
| 51 | RSp1552 | K04771 | <i>degP</i> | serine protease Do                                         | up   |

Table S5. DEGs in KEGG BRITE database annotation

| No. | KOID    | Function Orthology                    | GeneNo. |
|-----|---------|---------------------------------------|---------|
| 1   | ko01000 | Enzymes                               | 23      |
| 2   | ko02000 | Transporters                          | 13      |
| 3   | ko02035 | Bacterial motility proteins           | 4       |
| 4   | ko03000 | Transcription factors                 | 4       |
| 5   | ko03021 | Transcription machinery               | 3       |
| 6   | ko02044 | Secretion system                      | 3       |
| 7   | ko03400 | DNA repair and recombination proteins | 1       |
| 8   | ko04147 | Exosome                               | 1       |
| 9   | ko03110 | Chaperones and folding catalysts      | 1       |
| 10  | ko01002 | Peptidases                            | 1       |
| 11  | ko01009 | Protein phosphatases                  | 1       |

**Table S6.** DEGs in virulence genes of *R. solanacearum*.

| No. | Gene ID | Gene name    | Pattern | Pathogenesis                                           |
|-----|---------|--------------|---------|--------------------------------------------------------|
| 1   | RSp1016 | <i>EpsD</i>  | down    | EPS synthesized key genes                              |
| 2   | RSp1003 | <i>xpsR</i>  | down    | Transcription regulator protein                        |
| 3   | RSp0140 | <i>HrpB2</i> | down    | Type III effector                                      |
| 4   | RSp0838 | <i>SpaO</i>  | down    | Type III effector                                      |
| 5   | RSp0837 | <i>EscR</i>  | down    | Type III effector                                      |
| 6   | RSp1002 | <i>tek</i>   | down    | EPS transmembrane transport                            |
| 7   | RSc2755 |              | down    | EPS synthesis-related genes                            |
| 8   | RSp1004 |              | down    | EPS synthesis-related genes                            |
| 9   | RSc2680 | <i>pilE2</i> | up      | type-4 fimbrial biogenesis transmembrane protein       |
| 10  | RSc0719 | <i>PilX</i>  | up      | type-4 fimbrial biogenesis pilx-related signal peptide |
| 11  | RSc0722 | <i>FimT</i>  | up      | type-4 fimbrial pilin related transmembrane protein    |
| 12  | RSc0723 | <i>PilE</i>  | up      | type-4 fimbrial pilin-related transmembrane protein    |
